# Supplementary material for: Development of biocompatible nanocubes as a T1-contrast enhancer for MR imaging of primary and metastatic liver cancer
Source: Royal Society of Chemistry journal article supplement (doi:10.1039/c4ra09554e), 2014-01-01
Supplement: c4ra09554e1.pdf [file c4ra09554e1.pdf]

## Supporting Information

### Development of Biocompatible Nanocubes as a $T_1$ -Contrast Enhancer for MR Imaging of Primary and Metastatic Liver Cancer

*Xiao-xia Song, Xian-zhu Xu, Hong-ping Wan, and Qun Tang\**

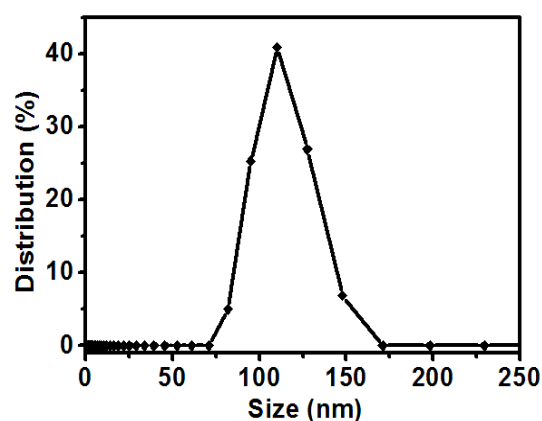

**Figure S1.** Hydrodynamic diameter distribution curve of the dextran-coated  $\text{KMnF}_3$  NCs under physiological conditions.

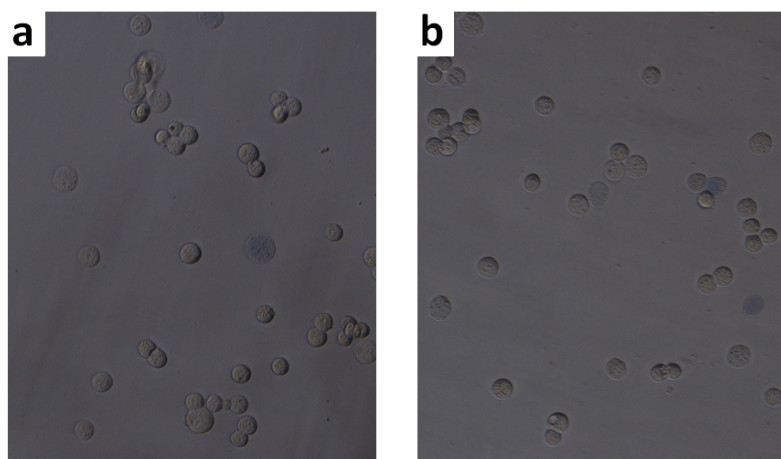

**Figure S2.** Microscopic observations of the liver cell before (a) and after (b) treated with 1 mM dextran-coated  $\text{KMnF}_3$  nanocube solutions via typlan blue staining.

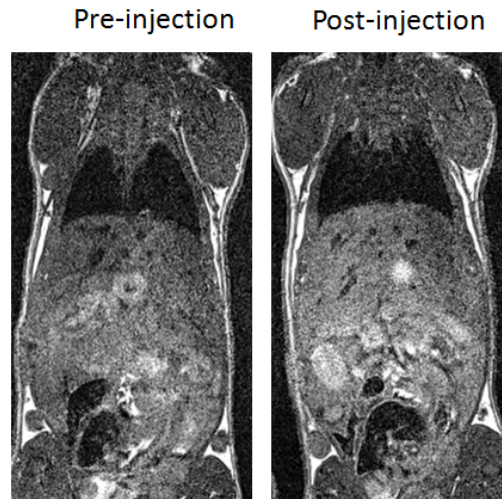

**Figure S3.** Representative  $T_1$  MR images of metastatic cancer bearing mice intravenously injected with commercial MnDPDP at the dosage of 5 mmol/kg.

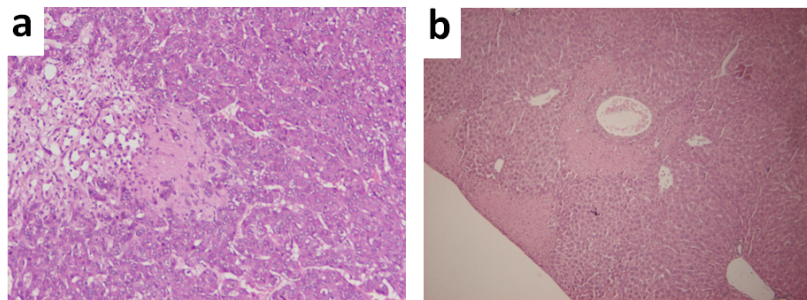

**Figure S4.** H&E staining of primary HCC cancer (a) and colorectal cancer (CRC) liver metastasis.
